# Supplementary material for: Socioeconomic Disparities in Functional Status in a National Sample of Patients With Rheumatoid Arthritis
Source: PubMed Central journal article supplement (PMC8339935; doi:10.1001/jamanetworkopen.2021.19400), 2021-08-04
Supplement: jamanetwopen-e2119400-s001.pdf [file jamanetwopen-e2119400-s001.pdf]

## Supplemental Online Content

Izadi Z, Li J, Evans M, et al. Socioeconomic disparities in functional status in a national sample of patients with rheumatoid arthritis. *JAMA Netw Open*. 2021;4(8):e2119400. doi:10.1001/jamanetworkopen.2021.19400

**eTable.** Comparison of Patient Demographic Characteristics Across the Area Deprivation Index Quintiles

This supplemental material has been provided by the authors to give readers additional information about their work.

| <b>eTable. Comparison of Patient Demographic Characteristics Across the Area Deprivation Index Quintiles</b>                                                                                           |                                                         |                                    |                                    |                                    |                                                        |           |
|--------------------------------------------------------------------------------------------------------------------------------------------------------------------------------------------------------|---------------------------------------------------------|------------------------------------|------------------------------------|------------------------------------|--------------------------------------------------------|-----------|
| <b>Cross-sectional Cohort: Patients with RA and at least 1 FS scores documented during the study period, N=83,965.</b>                                                                                 |                                                         |                                    |                                    |                                    |                                                        |           |
|                                                                                                                                                                                                        | <b>1<sup>st</sup> ADI Quintile</b><br>Highest SES level | <b>2<sup>nd</sup> ADI Quintile</b> | <b>3<sup>rd</sup> ADI Quintile</b> | <b>4<sup>th</sup> ADI Quintile</b> | <b>5<sup>th</sup> ADI Quintile</b><br>Lowest SES level | <b>P*</b> |
| <b>Age, mean (SD)</b>                                                                                                                                                                                  | 63.87 (14.1)                                            | 63.33 (14.0)                       | 63.32 (13.7)                       | 63.18 (13.5)                       | 63.32 (13.2)                                           | <0.05     |
| <b>Female</b>                                                                                                                                                                                          | 12853 (76.9%)                                           | 12779 (77.8%)                      | 12895 (76.6%)                      | 13282 (76.6%)                      | 12840 (77.2%)                                          | <0.05     |
| <b>Race/ethnicity</b>                                                                                                                                                                                  |                                                         |                                    |                                    |                                    |                                                        | <0.05     |
| Non-Hispanic White                                                                                                                                                                                     | 12157 (72.7%)                                           | 12133 (73.9%)                      | 12478 (74.1%)                      | 12718 (73.3%)                      | 10551 (63.5%)                                          |           |
| Hispanic                                                                                                                                                                                               | 715 (4.3%)                                              | 888 (5.4%)                         | 771 (4.6%)                         | 803 (4.6%)                         | 1127 (6.8%)                                            |           |
| African American                                                                                                                                                                                       | 775 (4.6%)                                              | 966 (5.9%)                         | 1132 (6.7%)                        | 1417 (8.2%)                        | 2610 (15.7%)                                           |           |
| Asian                                                                                                                                                                                                  | 555 (3.3%)                                              | 230 (1.4%)                         | 148 (0.9%)                         | 94 (0.5%)                          | 79 (0.5%)                                              |           |
| Other/Mixed                                                                                                                                                                                            | 1161 (6.9%)                                             | 979 (6.0%)                         | 981 (5.8%)                         | 939 (5.4%)                         | 936 (5.6%)                                             |           |
| Unknown                                                                                                                                                                                                | 1355 (8.1%)                                             | 1228 (7.5%)                        | 1335 (7.9%)                        | 1380 (8.0%)                        | 1324 (8.0%)                                            |           |
| <b>Longitudinal Cohort: Patients with RA and ≥ 2 FS scores documented during the study period at least 12-months apart, N=35,385.</b>                                                                  |                                                         |                                    |                                    |                                    |                                                        |           |
|                                                                                                                                                                                                        | <b>1<sup>st</sup> ADI Quintile</b><br>Highest SES level | <b>2<sup>nd</sup> ADI Quintile</b> | <b>3<sup>rd</sup> ADI Quintile</b> | <b>4<sup>th</sup> ADI Quintile</b> | <b>5<sup>th</sup> ADI Quintile</b><br>Lowest SES level | <b>P*</b> |
| <b>Age, mean (SD)</b>                                                                                                                                                                                  | 64.00 (13.5)                                            | 63.79 (13.5)                       | 63.60 (13.0)                       | 63.56 (12.9)                       | 63.77 (12.6)                                           | 0.29      |
| <b>Female</b>                                                                                                                                                                                          | 5584 (77.8%)                                            | 5650 (78.9%)                       | 5375 (76.4%)                       | 5346 (76.7%)                       | 5439 (77.2%)                                           | <0.05     |
| <b>Race/ethnicity</b>                                                                                                                                                                                  |                                                         |                                    |                                    |                                    |                                                        | <0.05     |
| Non-Hispanic White                                                                                                                                                                                     | 5506 (76.7%)                                            | 5433 (75.9%)                       | 5300 (75.4%)                       | 5209 (74.7%)                       | 4672 (66.3%)                                           |           |
| Hispanic                                                                                                                                                                                               | 284 (4.0%)                                              | 322 (4.5%)                         | 251 (3.6%)                         | 218 (3.1%)                         | 369 (5.2%)                                             |           |
| African American                                                                                                                                                                                       | 388 (5.4%)                                              | 435 (6.1%)                         | 458 (6.5%)                         | 564 (8.1%)                         | 1031 (14.6%)                                           |           |
| Asian                                                                                                                                                                                                  | 250 (3.5%)                                              | 109 (1.5%)                         | 70 (1.0%)                          | 38 (0.6%)                          | 28 (0.4%)                                              |           |
| Other/Mixed                                                                                                                                                                                            | 385 (5.4%)                                              | 374 (5.2%)                         | 367 (5.2%)                         | 333 (4.8%)                         | 343 (4.9%)                                             |           |
| Unknown                                                                                                                                                                                                | 362 (5.1%)                                              | 487 (6.8%)                         | 588 (8.4%)                         | 609 (8.7%)                         | 602 (8.6%)                                             |           |
| *Unadjusted p-values were obtained using Chi-squared test for categorical variables and one-way ANOVA test for continuous variables.<br><b>RA:</b> Rheumatoid arthritis; <b>FS:</b> Functional status; |                                                         |                                    |                                    |                                    |                                                        |           |
